# Supplementary material for: Predicting non-small cell lung cancer prognosis by fully automated microscopic pathology image features
Source: PubMed Central journal article supplement (PMC4990706; doi:10.1038/ncomms12474), 2016-08-16
Supplement: ncomms12474-s1.pdf [file ncomms12474-s1.pdf]

Supplementary  
Figure 1

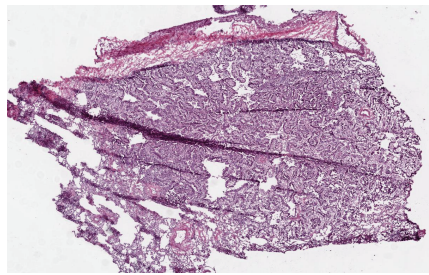

(A) Acquired Whole-slide  
Histopathology Images

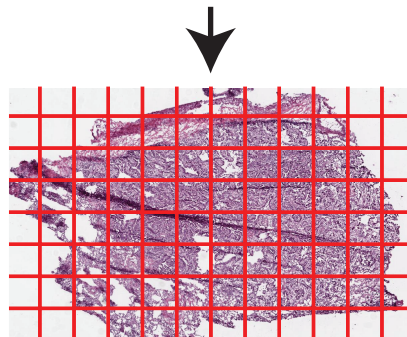

(B) Tiled Whole-slide  
Histopathology Images

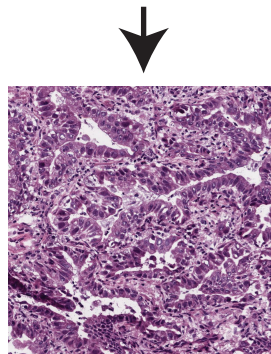

(C) Selected Representative  
Image Tiles

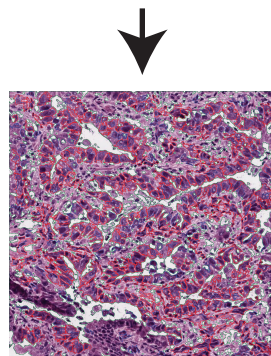

(D) Segmented Image Tiles

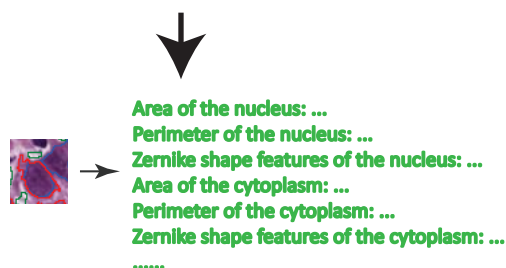

(E) Extracted Quantitative  
Image Features

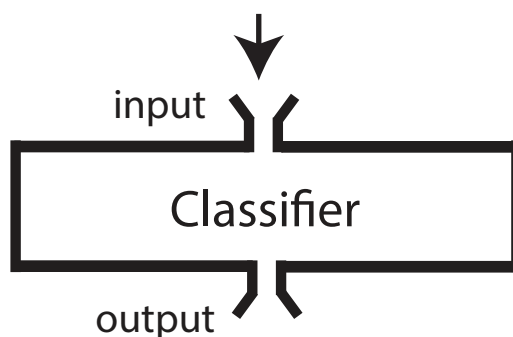

(F) Generated Machine  
Learning Models

**Supplementary Figure 1.** (Previous page) Diagram of informatics workflow of histopathology image processing. Digital whole-slide microscopic pathology images were (A) acquired and (B) tiled with open microscopy environment tools. (C) Dense image tiles were selected, as they typically show pathological changes in the lung, such as tumor, lymphocytic infiltration, inflammation, or atelectasis. (D) Tumor nuclei and cytoplasm were segmented with modules in CellProfiler. (E) Quantitative features were extracted from the identified cell nuclei and cytoplasm, (F) and were used for classification tasks.

## Supplementary Figure 2

A

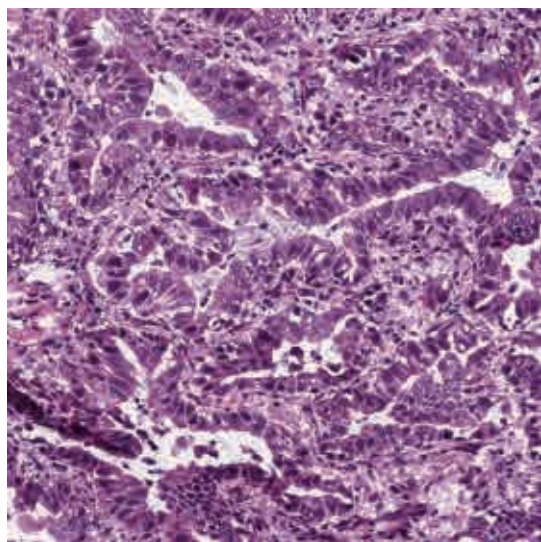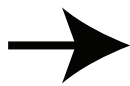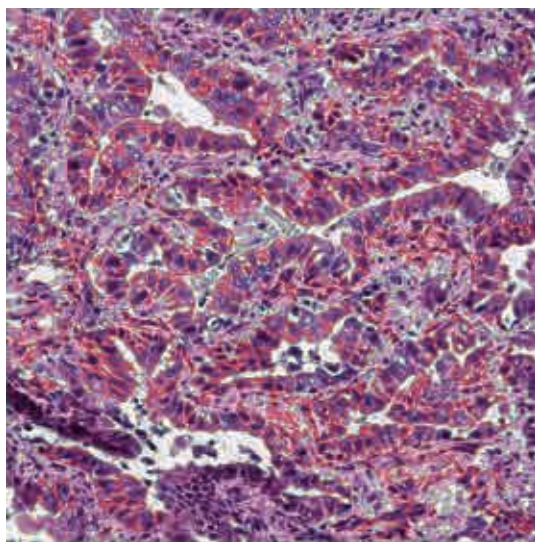

B

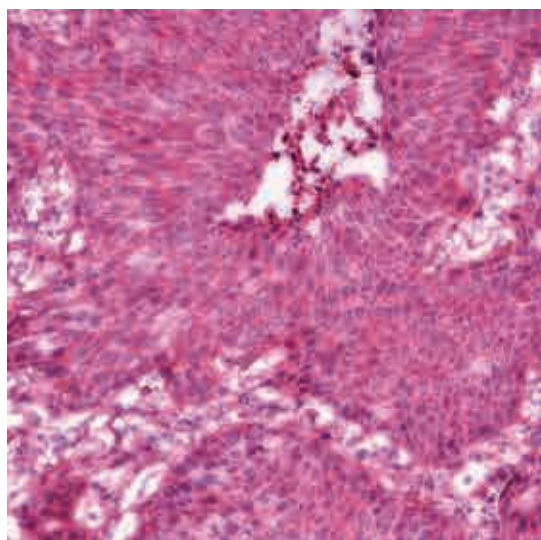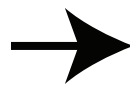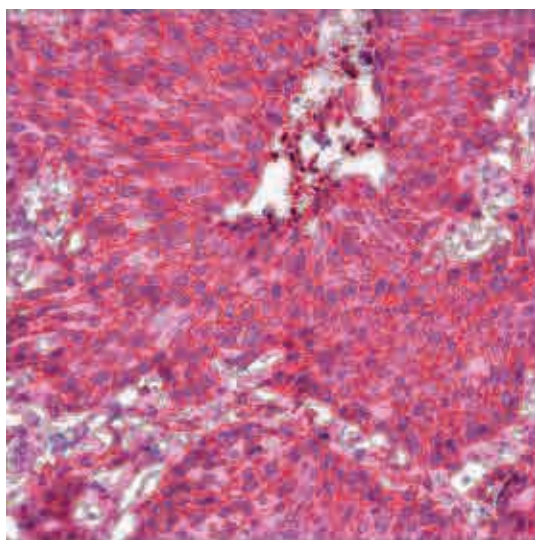

**Supplementary Figure 2.** (Previous page) Fully automated image segmentation algorithm identified most tumor nuclei and tumor cells from the images. (A) Raw histopathology image from a lung adenocarcinoma patient (left) and the segmented image (right). (B) Raw histopathology image from a lung squamous cell carcinoma patient (left) and the segmented image (right). In the segmented image, blue outlines indicated tumor nuclei, whereas red outlines indicated tumor cytoplasm.

## Supplementary Figure 3

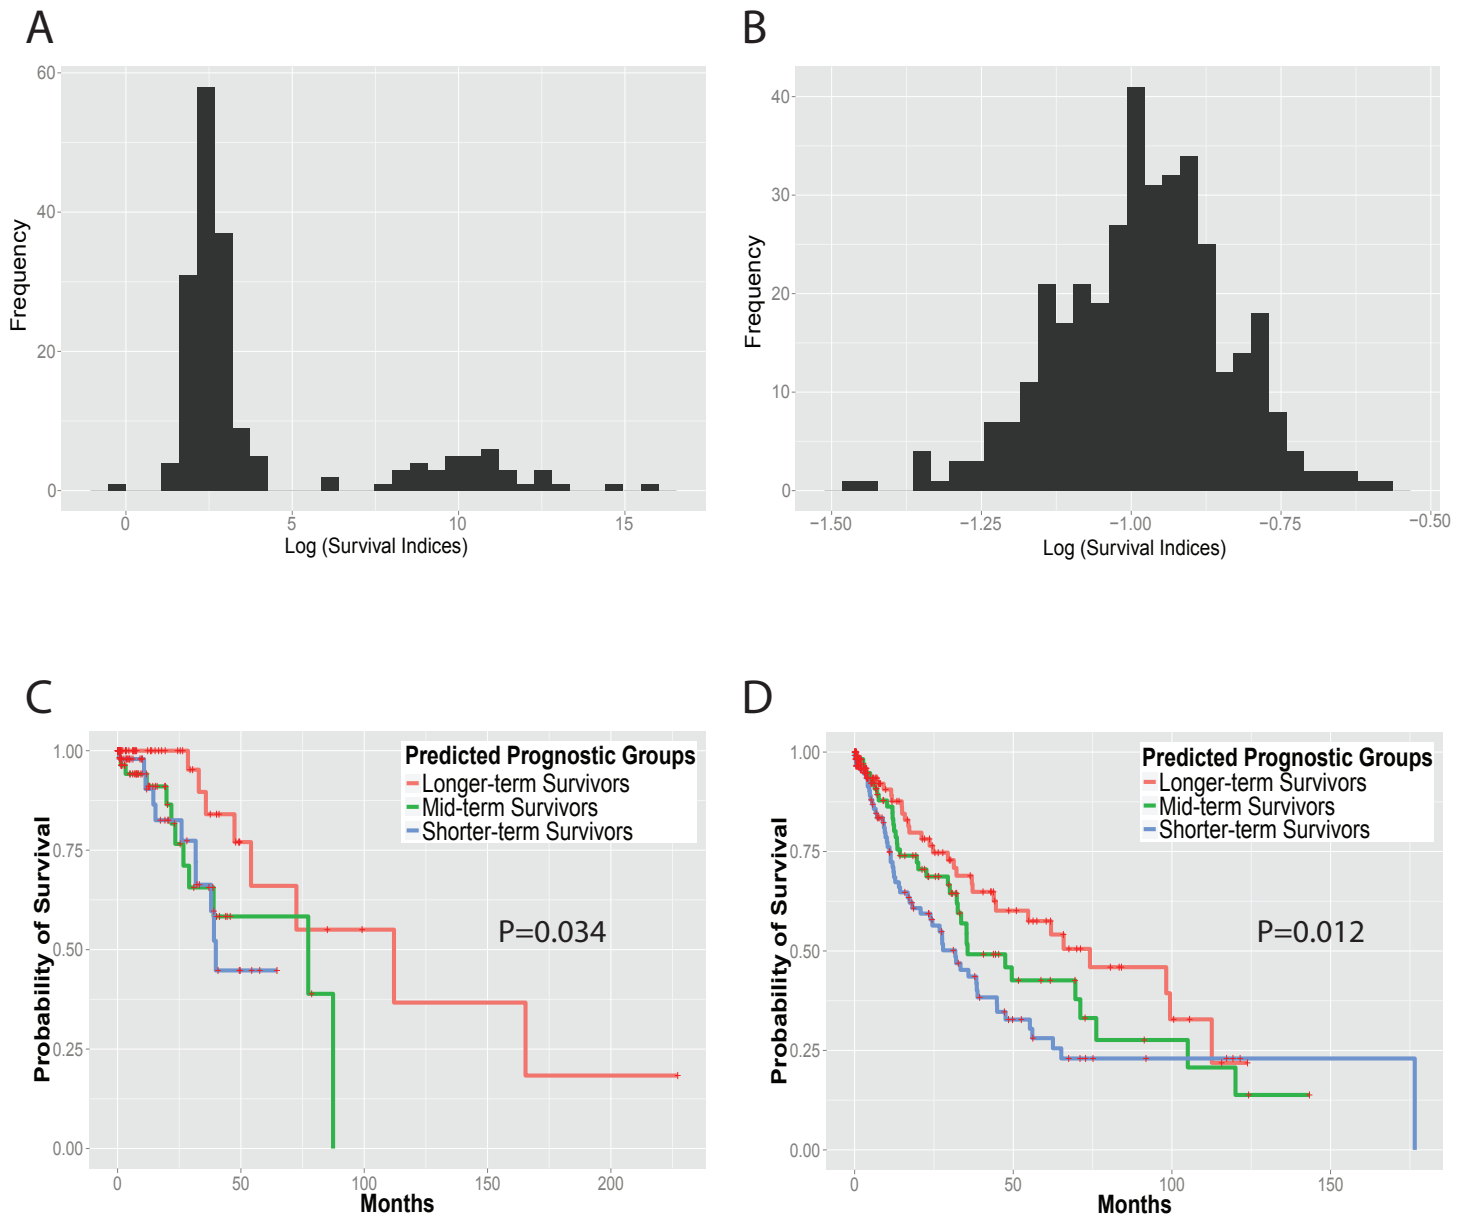

**Supplementary Figure 3.** The differences between the survival outcomes of different survival groups are robust for different numbers of groups. (A) Distribution of log-transformed survival indices of TCGA patients with lung adenocarcinoma. (B) Distribution of log-transformed survival indices of TCGA patients with lung squamous cell carcinoma. (C) Sensitivity analysis showed that the survival differences between groups persisted when dividing adenocarcinoma patients into three prognostic groups ( $P=0.034$ ). (D) The same analysis showed that the survival differences between groups also persisted when dividing lung squamous cell carcinoma patients into three prognostic groups ( $P=0.012$ ).

**Supplementary Table 1.** Categories of Features Included in this Study

| <b>Feature Category</b>                            | <b>CellProfiler Module</b>      | <b>Feature Examples</b>                                                                                                                    |
|----------------------------------------------------|---------------------------------|--------------------------------------------------------------------------------------------------------------------------------------------|
| Image Quality                                      | MeasureImageQuality             | Focus score, minimum intensity, maximum intensity                                                                                          |
| Image Granularity                                  | MeasureGranularity              | Granularity of hematoxylin stained image, granularity of unmixed eosin stained image                                                       |
| Image Intensity                                    | MeasureImageIntensity           | Mean intensity, standard deviation of intensity, and lower and upper quartile of intensity of unmixed hematoxylin and eosin stained images |
| Cell Size and Shape                                | MeasureObjectSizeShape          | Area, perimeter, Zernike shape features                                                                                                    |
| Pixel Intensity of the Cell                        | MeasureObjectIntensity          | Mean intensity, mean edge intensity, lower quartile intensity, upper quartile intensity                                                    |
| Radial Distribution of Pixel Intensity of the Cell | MeasureObjectRadialDistribution | Mean fractional intensity at a given radius                                                                                                |
| Cell Texture                                       | MeasureTexture                  | Haralick texture features, Gabor wavelet features                                                                                          |
| Area Occupied by Cells                             | MeasureImageAreaOccupied        | Total area occupied by the cells, total perimeter occupied by the cells                                                                    |
| Pixel Correlation of the Cells                     | MeasureCorrelation              | Correlation coefficients between unmixed hematoxylin and eosin stained cell regions                                                        |
| Neighboring Relation of the Cells                  | MeasureObjectNeighbors          | The distance to the closest cell, the distance to the second closest cell                                                                  |
| Nucleus Size and Shape                             | MeasureObjectSizeShape          | Area, perimeter, Zernike shape features                                                                                                    |
| Pixel Intensity of the Nuclei                      | MeasureObjectIntensity          | Mean intensity, mean edge intensity, lower quartile intensity, upper quartile intensity                                                    |
| Radial Distribution of Pixel Intensity of the      | MeasureObjectRadialDistribution | Mean fractional intensity at a given radius                                                                                                |

|                                    |                          |                                                                                 |
|------------------------------------|--------------------------|---------------------------------------------------------------------------------|
| Nuclei                             |                          |                                                                                 |
| Nucleus Texture                    | MeasureTexture           | Haralick texture features, Gabor wavelet features                               |
| Area Occupied by Nuclei            | MeasureImageAreaOccupied | Total area occupied by the nuclei, total perimeter occupied by the nuclei       |
| Pixel Correlation of the Nuclei    | MeasureCorrelation       | Correlation coefficients between hematoxylin and eosin stained nucleus regions  |
| Neighboring relation of the Nuclei | MeasureObjectNeighbors   | The distance to the closest nucleus, the distance to the second closest nucleus |

**Supplementary Table 2.** Performance of Classifiers in Distinguishing Tumor Parts from Adjacent Dense Normal Tissues

| <b>Classifiers</b>                                  | <b>AUCs for Distinguishing Adenocarcinoma from Adjacent Dense Normal Tissues</b> | <b>AUCs for Distinguishing Squamous Cell Carcinoma from Adjacent Dense Normal Tissues</b> |
|-----------------------------------------------------|----------------------------------------------------------------------------------|-------------------------------------------------------------------------------------------|
| SVM with Gaussian Kernel                            | 0.85                                                                             | 0.88                                                                                      |
| SVM with Linear Kernel                              | 0.82                                                                             | 0.86                                                                                      |
| SVM with Polynomial Kernel                          | 0.77                                                                             | 0.84                                                                                      |
| Naïve Bayes Classifier                              | 0.73                                                                             | 0.77                                                                                      |
| Bagging                                             | 0.83                                                                             | 0.87                                                                                      |
| Random Forest utilizing Conditional Inference Trees | 0.85                                                                             | 0.87                                                                                      |
| Breiman's Random Forest                             | 0.85                                                                             | 0.87                                                                                      |

\*AUC: Area Under Receiver Operating Characteristic Curves



**Supplementary Table 3.** Performance of Classifiers in Distinguishing Adenocarcinoma from Squamous Cell Carcinoma

| <b>Classifiers</b>                                  | <b>AUCs of the TCGA Cohort</b> | <b>AUCs of the TMA Cohort</b> |
|-----------------------------------------------------|--------------------------------|-------------------------------|
| SVM with Gaussian Kernel                            | 0.75                           | 0.85                          |
| SVM with Linear Kernel                              | 0.7                            | 0.82                          |
| SVM with Polynomial Kernel                          | 0.74                           | 0.78                          |
| Naïve Bayes Classifier                              | 0.63                           | 0.73                          |
| Bagging                                             | 0.74                           | 0.75                          |
| Random Forest utilizing Conditional Inference Trees | 0.73                           | 0.78                          |
| Breiman's Random Forest                             | 0.75                           | 0.76                          |

\*AUC: Area Under Receiver Operating Characteristic Curves
